# Supplementary material
Source: PubMed Central journal article supplement (PMC7192210)
Supplement: NIHMS837588-supplement-Table_S1.pdf [file NIHMS837588-supplement-Table_S1.pdf]

## Tables

Table S1. The level of each cytokine was compared between male and female patients.

| Cytokine | Fold male/female | p-value |
|----------|------------------|---------|
| MCP-1    | 0.83             | 0.38    |
| IP-10    | 8.12             | 0.19    |
| IL-6     | 0.90             | 0.41    |
| IL-12    | 0.67             | 0.07    |
| VEGF     | 0.56             | 0.14    |

\*The p-value was calculated using a two-tailed t-test.
